# Supplementary material for: Differentially Expressed Transcripts and Dysregulated Signaling Pathways and Networks in African American Breast Cancer
Source: PLoS One. 2013 Dec 4;8(12):e82460. doi: 10.1371/journal.pone.0082460 (PMC3853650; doi:10.1371/journal.pone.0082460)
Supplement: Table S3 — A. Differentially expressed genes and other transcripts identified in stage I tumors with DESeq. B. Differentially expressed genes and other transcripts identified in stage II tumors with DESeq. C. Differentially expressed genes and other transcripts identified in stage III tumors with DESeq. D. Differentially expressed genes and other transcripts identified in luminal A tumors with DESeq. E. Differentially expressed genes and other transcripts identified in HER2 tumors with DESeq. F. Differentially expressed genes and other transcripts identified in triple negative tumors with DESeq. (XLSX) [file pone.0082460.s003.xlsx]

## Sheet: A
Table S3A - Differentially expressed genes and other transcripts identified in stage I tumors with DESeq.
Gene Symbol.Entrez ID	Base Mean	Base Mean CA	Base Mean AA	Fold-Change	log2 Fold-Change	P-value	Padj
PRSS45.377047	8.85246	6.33116	35.6699	5.63402	2.49417	0.000131284	0.328735
GPR89B.51463	95.6844	80.5212	256.966	3.19129	1.67414	0.000234503	0.373559
DAPP1.27071	963.948	812.9	2570.55	3.1622	1.66093	0.000104531	0.328735
TUBB8.347688	29.0284	26.4181	56.7926	2.14976	1.10417	0.000151775	0.337817
BUB1.699	1316.22	1205.21	2496.98	2.07183	1.05091	0.000979742	0.743553
C17orf46.124783	6.90892	6.35848	12.7637	2.00735	1.00529	0.00012039	0.328735
PLA2G4C.8605	451.278	415.681	829.896	1.99647	0.997452	0.000417553	0.440232
NOTCH2NL.388677	2346.62	2171.89	4205.14	1.93616	0.953201	1.43e-05	0.286126
TEC.7006	102.738	95.4984	179.737	1.88209	0.912339	0.00037644	0.440232
RIPK2.8767	1844.07	1740.29	2947.83	1.69387	0.760325	0.000232587	0.373559
PRPF3.9129	3169.77	2993.83	5041.09	1.68383	0.751743	7.93e-05	0.328735
ENDOD1.23052	3510.19	3324.75	5482.63	1.64904	0.721622	0.000808229	0.674602
LOC145783.145783	102.195	96.8656	158.878	1.64019	0.713861	0.000301694	0.402682
CHMP4C.92421	1551.67	1474.68	2370.56	1.6075	0.684819	0.000960356	0.743553
SERTAD2.9792	3705.64	3538.34	5485.13	1.5502	0.632452	0.000321631	0.402682
RFX5.5993	4044.11	3862.91	5971.45	1.54584	0.628393	0.000411698	0.440232
TUBD1.51174	558.56	534.201	817.656	1.53061	0.614111	0.000111121	0.328735
SEC31A.22872	16217.5	15773.3	20941.8	1.32767	0.4089	0.000652228	0.60195
NIF3L1.60491	1344.96	1309.76	1719.41	1.31277	0.392619	0.000110811	0.328735
LOC90784.90784	955.054	982.244	665.853	0.67789	-0.560878	0.000661087	0.60195
C19orf44.84167	458.209	472.161	309.819	0.656172	-0.607853	0.000242425	0.373559
SPATA7.55812	434.179	447.806	289.243	0.645912	-0.63059	4.64e-05	0.328735
C17orf103.256302	933.352	966.259	583.345	0.603714	-0.728062	0.000480294	0.481062
LOC100130093.100130093	296.29	309.125	159.767	0.516836	-0.952221	0.000200292	0.373559
DYNC2H1.79659	1362.82	1430.68	641.084	0.448098	-1.15811	0.00071106	0.619302
GALNT6.11226	10835.1	11458.9	4199.42	0.366476	-1.44821	0.000299683	0.402682

## Sheet: B
Table S3B - Differentially expressed genes and other transcripts identified in stage II tumors with DESeq.
Gene Symbol.Entrez ID	Base Mean	Base Mean CA	Base Mean AA	Fold-Change	log2 Fold-Change	P-value	Padj
SCN1A.6323	12.5011	8.63352	57.4454	6.65376	2.73417	3.92e-05	0.033617
RETN.56729	2.30699	1.63486	10.1176	6.18863	2.62962	1.08e-05	0.0140146
PRSS45.377047	6.6957	5.13398	24.844	4.83913	2.27475	9.72e-07	0.00326957
ANKRD20A3.441425	24.7702	19.0253	91.5296	4.81095	2.26632	7.2e-05	0.0450516
CRYBB2.1415	6.9022	5.57212	22.3586	4.01259	2.00453	3.27e-10	6.6e-06
FLJ26850.400710	4.84143	4.12708	13.1427	3.18449	1.67106	2.36e-06	0.00475217
LRRC36.55282	23.744	20.4774	61.7042	3.01328	1.59133	0.000184035	0.0714234
SERPINC1.462	9.08323	7.95373	22.2087	2.79224	1.48142	9.01e-06	0.0129849
C1QL3.389941	52.615	47.45	112.637	2.3738	1.2472	0.000102293	0.055794
PIF1.80119	128.858	117.296	263.214	2.24401	1.16608	0.000239245	0.0754407
PCK2.5106	3380.53	3137.03	6210.21	1.97965	0.985242	5.85e-05	0.0394867
TOP1MT.116447	1829.91	1701.68	3320.02	1.95102	0.964229	9.64e-07	0.00326957
AURKB.9212	722.403	672.262	1305.08	1.94132	0.957039	0.000459725	0.0997603
CIB1.10519	6368.68	5939.91	11351.3	1.91102	0.934345	0.000680771	0.108178
RHD.6007	9.72023	9.0735	17.2358	1.89957	0.925675	0.000248744	0.0772294
HSD11B2.3291	634.233	592.268	1121.89	1.89423	0.921608	0.000852503	0.116248
E2F2.1870	622.213	581.318	1097.44	1.88785	0.916742	0.000665213	0.107397
TYMS.7298	2233.62	2089.43	3909.22	1.87095	0.903772	0.000756509	0.113231
PTTG3P.26255	7.10504	6.65081	12.3835	1.86196	0.896822	0.000736741	0.112638
IDH2.3418	11812.1	11094	20157.4	1.81697	0.861534	0.000493826	0.102232
SLC7A9.11136	12.5559	11.8032	21.3018	1.80475	0.851795	0.000969359	0.122266
MYLK2.85366	13.9573	13.1289	23.5844	1.79638	0.845091	0.000788293	0.113231
KIF18B.146909	686.176	646.6	1146.07	1.77245	0.825745	0.000792906	0.113231
HES4.57801	169.983	160.361	281.8	1.75728	0.813343	0.00019954	0.0719049
CHCHD10.400916	1033.94	975.607	1711.76	1.75456	0.811109	0.000170917	0.0703935
IFITM3.10410	25083.7	23694.8	41224	1.7398	0.798918	5.16e-05	0.0385488
FAM22F.54754	5.74275	5.42727	9.40881	1.73362	0.793785	0.0005025	0.102232
HSBP1L1.440498	468.987	443.854	761.043	1.71463	0.777893	5.19e-07	0.00261962
DDX12.440081	229.128	216.922	370.967	1.71014	0.774113	0.00058732	0.104891
CROCCL1.84809	632.849	600.997	1002.99	1.66888	0.738884	5e-09	5.04e-05
TYSND1.219743	1655.31	1572.48	2617.8	1.66475	0.735309	8.03e-05	0.047668
SNAI1.6615	369.441	351.218	581.202	1.65482	0.726671	0.000744927	0.113033
CDK1.983	2992.1	2846.49	4684.21	1.64561	0.71862	0.000674312	0.108002
CKS2.1164	2107.72	2005.33	3297.57	1.6444	0.717563	0.000908513	0.120623
TKT.7086	11431.2	10879.8	17838	1.63955	0.713301	1.67e-05	0.0197725
NEURL1B.54492	2863.38	2725.93	4460.59	1.63635	0.710485	0.000300613	0.081982
LOC642846.642846	362.744	345.57	562.326	1.62724	0.702431	0.000659966	0.107397
ARHGAP33.115703	593.419	565.551	917.256	1.62188	0.697667	0.000155853	0.0703935
AURKAPS1.6791	36.4335	34.7297	56.233	1.61916	0.695247	0.000810542	0.114388
PI4KAP2.375133	236.149	225.229	363.048	1.61191	0.688768	0.000206979	0.0719049
SNHG7.84973	1372.84	1309.98	2103.31	1.6056	0.68311	6.03e-06	0.00935335
NSUN5P1.155400	239.9	228.928	367.399	1.60487	0.682455	0.000423895	0.0988034
ESPL1.9700	1042.35	994.975	1592.87	1.60091	0.678893	0.000707125	0.110624
HMGB2.3148	8225.65	7853.65	12548.5	1.59779	0.676079	0.000276966	0.0808753
LOC541471.541471	683.236	652.524	1040.13	1.59401	0.672663	4.9e-05	0.0380501
GABPB1.2553	1570.18	1501.31	2370.55	1.57899	0.659002	3.6e-05	0.0329838
LOC388796.388796	1002.16	959.928	1492.87	1.55519	0.637092	0.00037628	0.0949213
FAM158A.51016	505.414	484.643	746.79	1.54091	0.623781	0.000537598	0.103458
LLGL2.3993	4325.11	4148.27	6380.07	1.53801	0.621061	0.000109483	0.058144
CDCA4.55038	1233.26	1184.23	1802.94	1.52246	0.606401	0.000143878	0.0703935
C15orf41.84529	317.696	305.097	464.108	1.52118	0.605194	0.000270448	0.0802634
LOC220930.220930	241.492	231.977	352.069	1.51769	0.601876	0.000725072	0.1117
MRPL48.51642	1213.8	1166.35	1765.14	1.51338	0.597779	2.76e-05	0.026562
TACC3.10460	2480.88	2384.09	3605.63	1.51237	0.596814	0.000920092	0.120808
PWP2.5822	2236.59	2150.3	3239.28	1.50643	0.591133	2.55e-05	0.025748
CCDC34.91057	1089.03	1048.04	1565.25	1.4935	0.578696	0.00045077	0.0997603
IFI27L1.122509	257.255	247.608	369.362	1.49172	0.576977	0.000612428	0.106676
RPS26.6231	1639.04	1579.23	2334.02	1.47795	0.563595	0.000234983	0.0752727
HAUS7.55559	661.206	637.63	935.177	1.46665	0.552521	0.000557668	0.103458
SLC25A19.60386	760.834	733.951	1073.23	1.46227	0.548208	0.000568504	0.103458
LOC150776.150776	1103.13	1064.47	1552.45	1.45843	0.544413	0.000621047	0.106676
DUT.1854	2623.7	2533.41	3672.93	1.4498	0.535851	0.000213934	0.0719049
DKFZP686I15217.401232	164.765	159.22	229.203	1.43953	0.5256	9.68e-05	0.0542458
TRAIP.10293	328.383	317.537	454.419	1.43107	0.517098	0.000567523	0.103458
TXN.7295	8558.05	8275.6	11840.2	1.43074	0.516762	0.000167951	0.0703935
INPP5E.56623	666.182	644.382	919.509	1.42696	0.512948	1.46e-06	0.00370736
PPP1R13L.10848	2394.66	2316.76	3299.9	1.42436	0.510311	0.000423984	0.0988034
NOTCH2NL.388677	2319.4	2243.97	3196	1.42426	0.510214	0.000595527	0.105424
POC1A.25886	672.426	650.561	926.504	1.42416	0.510112	0.000644889	0.106676
DNAJC15.29103	1963.54	1899.91	2702.93	1.42266	0.508593	0.000205501	0.0719049
CDAN1.146059	1049.71	1015.72	1444.67	1.42232	0.508244	0.000623369	0.106676
POLD1.5424	1261.15	1220.34	1735.3	1.42198	0.507901	0.000963363	0.122266
FANCG.2189	1143.08	1107.16	1560.45	1.40942	0.495098	0.00021464	0.0719049
AEN.64782	1449.89	1405.44	1966.41	1.39915	0.484548	0.000534844	0.103458
C18orf10.25941	3803.74	3687.45	5155.17	1.39803	0.483398	0.000845432	0.116248
DDX51.317781	1204.13	1167.77	1626.57	1.39288	0.478075	2.2e-06	0.00475217
ZDHHC12.84885	1810.38	1756.85	2432.42	1.38454	0.469402	7.37e-05	0.0450516
C1orf159.54991	463.999	450.297	623.225	1.38403	0.468878	0.000826029	0.115764
SIGMAR1.10280	4036.75	3917.65	5420.77	1.38368	0.46851	0.000689593	0.108724
LOC100134713.100134713	52.4918	50.9446	70.472	1.38331	0.468122	0.000430836	0.0988034
ODF2.4957	3674.6	3566.88	4926.38	1.38114	0.465864	1.47e-06	0.00370736
NR2C2AP.126382	1441.8	1399.77	1930.17	1.37892	0.463535	0.000504513	0.102232
UBAC1.10422	1932.07	1876.33	2579.82	1.37493	0.459362	4.01e-06	0.00674862
MRPS2.51116	2280.6	2214.87	3044.43	1.37454	0.458953	4.16e-05	0.033617
TPRA1.131601	1856.36	1803.11	2475.19	1.37274	0.457053	1.11e-05	0.0140146
SNRPD2.6633	7651.28	7435.41	10159.9	1.36642	0.450399	0.000502135	0.102232
CLN6.54982	2737.37	2662.04	3612.73	1.35713	0.440558	0.000207272	0.0719049
LIG1.3978	2274.04	2212.06	2994.33	1.35364	0.436843	0.000638904	0.106676
GTF3C5.9328	3120.5	3035.62	4106.77	1.35286	0.436012	0.000280525	0.0808753
NUP85.79902	2299.59	2237.68	3018.98	1.34916	0.432058	0.000563868	0.103458
RRP9.9136	982.772	956.385	1289.4	1.3482	0.431037	0.000158962	0.0703935
CCDC61.729440	333.246	324.416	435.861	1.34353	0.426025	0.000398497	0.0963677
HAUS4.54930	2296.28	2236.02	2996.56	1.34013	0.422374	5.87e-05	0.0394867
SMPD4.55627	5846.22	5696.2	7589.55	1.33239	0.414015	0.000548061	0.103458
LOC285359.285359	191.029	186.16	247.606	1.33007	0.411504	0.000439045	0.0995546
NOL12.79159	638.966	622.716	827.792	1.32932	0.410693	0.000983215	0.122483
ZDHHC18.84243	2170.07	2115.73	2801.48	1.32412	0.405029	0.000869712	0.117011
POU2F1.5451	414.401	404.091	534.217	1.32202	0.402746	0.000392943	0.0963677
TSEN54.283989	1552.02	1513.53	1999.25	1.32092	0.401539	0.000979028	0.122483
SFRS16.11129	1055.65	1029.55	1358.99	1.31999	0.400523	0.000289745	0.081213
TMCO6.55374	498.705	486.675	638.502	1.31197	0.391734	0.000858281	0.116248
EXD3.54932	432.147	421.768	552.753	1.31056	0.390183	0.000772677	0.113231
PIH1D1.55011	2517.16	2456.88	3217.67	1.30966	0.389192	0.000180883	0.0714234
MYPOP.339344	421.034	411.04	537.172	1.30686	0.386107	0.000223473	0.0727403
PRPF19.27339	9729.7	9499.55	12404.2	1.30577	0.384897	0.000951376	0.121517
METTL11A.28989	1065.47	1040.55	1354.99	1.30218	0.380931	0.000343928	0.0889847
MED10.84246	1147.26	1120.75	1455.4	1.2986	0.376959	0.000331177	0.0873353
CPSF3L.54973	3683.37	3600.77	4643.27	1.28952	0.366837	0.000203918	0.0719049
UQCRC1.7384	7613.59	7443.06	9595.33	1.28916	0.366437	0.000881164	0.117767
PCGF1.84759	690.698	675.233	870.416	1.28906	0.366321	0.000150178	0.0703935
C1orf172.126695	1195.31	1168.55	1506.23	1.28897	0.366216	0.000640712	0.106676
METT11D1.64745	1321.85	1292.85	1658.9	1.28313	0.359672	0.000401114	0.0963677
CSNK1E.1454	5531.74	5410.9	6935.92	1.28184	0.358217	0.000299009	0.081982
ZCCHC8.55596	1567	1533.36	1957.91	1.27687	0.352616	2.37e-05	0.0254683
OXA1L.5018	5808.84	5684.26	7256.58	1.27661	0.352317	9.27e-05	0.0534515
REXO4.57109	1550.7	1517.47	1936.85	1.27637	0.352046	0.000320175	0.0861527
NGDN.25983	1536.72	1504.2	1914.59	1.27283	0.348041	0.000368167	0.0940504
RNF220.55182	3263.17	3194.48	4061.47	1.2714	0.346422	0.000781667	0.113231
OSGEP.55644	1046.77	1024.8	1302.12	1.27061	0.34552	0.000631122	0.106676
TRAF2.7186	1396.74	1367.52	1736.33	1.2697	0.344483	0.000796733	0.113231
WDR45.11152	2478.43	2427.94	3065.26	1.2625	0.33628	2.59e-06	0.00475217
SUMO2.6613	10667.6	10452.7	13165.6	1.25955	0.332907	0.000943355	0.12141
PSMD9.5715	2274.41	2229.31	2798.51	1.25532	0.328058	0.000157218	0.0703935
STRN4.29888	4683.99	4595.7	5710	1.24246	0.313205	0.000262163	0.0794249
CIZ1.25792	4823.97	4733.05	5880.55	1.24244	0.31318	0.000465532	0.0999457
OPA3.80207	1384.52	1358.69	1684.64	1.2399	0.310225	0.000397016	0.0963677
MED27.9442	726.401	713.192	879.895	1.23374	0.303041	0.000856763	0.116248
ILKAP.80895	1109.34	1090.03	1333.79	1.22362	0.291161	0.000217343	0.0719049
SDHB.6390	3554.38	3492.76	4270.48	1.22267	0.290032	0.00044748	0.0997603
NUP62.23636	5048.3	4962.16	6049.35	1.2191	0.285813	0.000923969	0.120808
CNBP.7555	19507.9	19178.3	23338.2	1.21691	0.283217	0.000288518	0.081213
UCK1.83549	1658.49	1631.76	1969.11	1.20674	0.271111	0.000118139	0.0604675
HNRNPL.3191	15064.2	14824.4	17851.7	1.20421	0.268092	2.4e-05	0.0254683
C9orf78.51759	3795.1	3746.63	4358.44	1.1633	0.218219	0.000944522	0.12141
YIPF5.81555	3384	3429.48	2855.45	0.83262	-0.26427	0.000927862	0.120808
SON.6651	18720.7	18978.8	15721.8	0.828386	-0.271625	0.000766873	0.113231
DCTN5.84516	4777.07	4854.11	3881.81	0.799696	-0.322477	0.000263687	0.0794249
NEK1.4750	1241.64	1265.12	968.812	0.765788	-0.384984	0.000534731	0.103458
MCPH1.79648	1157.29	1179.94	894.127	0.757774	-0.400161	0.000554308	0.103458
PCNX.22990	3453.88	3522.46	2656.86	0.754262	-0.406862	0.000545192	0.103458
NAPEPLD.222236	1334.83	1363.3	1004.07	0.736505	-0.441233	4.16e-05	0.033617
TNKS.8658	3598.04	3675.53	2697.55	0.733923	-0.4463	0.000496936	0.102232
GTF2A1.2957	673.335	688.14	501.286	0.728465	-0.457069	0.000782013	0.113231
TMED10P1.286102	188.515	192.687	140.03	0.726723	-0.460523	0.000715985	0.111148
FYCO1.79443	4120.39	4214.84	3022.85	0.717193	-0.479567	0.000661315	0.107397
ENTPD4.9583	1386.74	1418.88	1013.24	0.714117	-0.485768	0.000455463	0.0997603
CLN8.2055	836.763	856.755	604.448	0.705509	-0.503263	0.000333225	0.0873353
CHMP7.91782	2886.8	2958.14	2057.74	0.695618	-0.523632	0.00011985	0.0604675
C9orf102.375748	354.106	363.039	250.298	0.689453	-0.536477	0.000841644	0.116248
MAN1A2.10905	2772.42	2843.32	1948.59	0.685323	-0.545143	0.000170303	0.0703935
MEIS3P1.4213	1303.16	1342.48	846.266	0.630376	-0.665716	0.000584267	0.104891
LOC90784.90784	1026.49	1059.1	647.551	0.611416	-0.709775	3.63e-08	0.000244441
CD302.9936	2292.87	2367.78	1422.45	0.600752	-0.735158	0.000179099	0.0714234
TMEM170B.100113407	566.825	585.464	350.234	0.598216	-0.741261	6.89e-05	0.0448508
FZD3.7976	522.583	541.365	304.324	0.562143	-0.830991	0.000202482	0.0719049
LRRC37A2.474170	410.401	425.353	236.657	0.556379	-0.845859	5.52e-05	0.0394867
LAMA2.3908	2077.08	2170.53	991.145	0.456637	-1.13088	0.000506574	0.102232
LOC349196.349196	14.6494	15.3974	5.95705	0.386888	-1.37001	0.000624826	0.106676
LOC441869.441869	330.343	347.329	132.952	0.382783	-1.3854	0.000569044	0.103458
SLC8A3.6547	12.6746	13.4075	4.15714	0.310059	-1.68938	0.000767709	0.113231
STON1.GTF2A1L.286749	19.8709	21.0925	5.67451	0.26903	-1.89416	0.000168472	0.0703935

## Sheet: C
Table S3C - Differentially expressed genes and other transcripts identified in stage III tumors with DESeq.
Gene Symbol.Entrez ID	Base Mean	Base Mean CA	Base Mean AA	Fold-Change	log2 Fold-Change	P-value	Padj
SNORA41.619569	0.0325828	0.00743451	0.264721	35.607	5.15409	0.000495742	0.0713976
RGS20.8601	22.4347	8.92847	147.108	16.4762	4.04231	0.000416417	0.0697239
C5orf27.202299	29.049	12.7837	179.19	14.0171	3.80911	0.000312465	0.0610854
MSLN.10232	1387.21	613.425	8529.87	13.9053	3.79757	0.000330574	0.0610854
SERPINB5.5268	1778.66	914.256	9757.82	10.673	3.41589	0.000952348	0.087055
C3orf24.115795	6.11864	3.53699	29.9493	8.46745	3.08193	0.000594392	0.0754645
GABRP.2568	5413.38	3303.5	24889.2	7.53417	2.91345	0.000806028	0.0862709
TMPRSS12.283471	1.23708	0.769175	5.55625	7.22365	2.85273	5.86e-05	0.0445905
PAX6.5080	210.448	134.693	909.724	6.75407	2.75576	0.000647096	0.0771085
GJD4.219770	1.00952	0.655753	4.2751	6.51938	2.70473	0.000598436	0.0754645
SLC39A2.29986	46.1987	30.6105	190.089	6.20993	2.63458	7.8e-05	0.047345
SLC22A16.85413	8.00746	5.39834	32.0917	5.94473	2.57161	0.000762515	0.0841803
TREML4.285852	2.13244	1.45071	8.4253	5.80772	2.53797	1.93e-05	0.0276399
TTLL2.83887	5.59015	3.83736	21.7698	5.67313	2.50414	5.2e-05	0.0445905
MATN1.4146	4.58924	3.22854	17.1496	5.31187	2.40922	1.3e-06	0.0094921
PRKY.5616	3.50372	2.48456	12.9114	5.19666	2.37758	3.17e-06	0.0126746
CXorf48.54967	2.2482	1.60446	8.19038	5.10475	2.35184	9.95e-05	0.0491131
MAL.4118	53.6332	39.0889	187.888	4.8067	2.26505	0.000837978	0.0862709
RXFP4.339403	1.36464	1.02384	4.5104	4.40536	2.13926	0.000525054	0.0729934
FCRL4.83417	6.28407	4.77158	20.2454	4.24292	2.08506	0.000140346	0.050171
ZBED2.79413	57.997	44.1216	186.078	4.21739	2.07635	0.000379721	0.0666504
BTN1A1.696	5.16155	3.93562	16.4779	4.18686	2.06587	0.000629899	0.0768899
CD38.952	174.423	133.246	554.523	4.16165	2.05716	0.000325168	0.0610854
DPF3.8110	46.4696	35.5979	146.823	4.12448	2.04421	0.000321668	0.0610854
LOC96610.96610	46424.2	35601.5	146327	4.11013	2.03918	0.000449622	0.070746
KCNK7.10089	11.0427	8.49324	34.5761	4.07101	2.02539	0.000204647	0.0565856
TRIM29.23650	2586.82	2002.73	7978.42	3.98377	1.99413	0.000382876	0.0666504
AIM2.9447	91.7486	71.2575	280.898	3.94201	1.97893	0.000302975	0.0610854
CD79A.973	491.242	384.085	1480.39	3.85432	1.94648	0.000278995	0.0607087
RNF112.7732	16.1401	12.7067	47.8328	3.76438	1.91241	0.000250615	0.0591157
FAM26F.441168	374.615	296.351	1097.05	3.70186	1.88825	0.000701213	0.082453
CD244.51744	42.0602	33.4754	121.304	3.62369	1.85746	6.03e-05	0.0445905
IL20RB.53833	41.1488	32.8084	118.137	3.60081	1.84832	0.000670779	0.0794575
FCRL5.83416	185.544	148.508	527.413	3.55141	1.82839	0.000646453	0.0771085
LYPD5.284348	265.567	212.57	754.765	3.55066	1.82809	0.00011437	0.0491131
SH2D2A.9047	192.911	154.847	544.27	3.5149	1.81348	0.000125212	0.0499362
HLA.DOB.3112	181.433	145.774	510.597	3.50266	1.80845	1.42e-06	0.0094921
DCHS2.54798	83.6189	67.3874	233.449	3.46428	1.79255	0.000464966	0.070746
KLF5.688	1607.72	1302.79	4422.41	3.39456	1.76323	0.000603143	0.0754645
BMP6.654	227.429	185.953	610.281	3.28191	1.71454	1.03e-05	0.0222184
MEFV.4210	25.8197	21.1124	69.2718	3.2811	1.71418	0.000257992	0.0600552
POU2AF1.5450	423.095	348.381	1112.76	3.19409	1.6754	0.000473548	0.070746
HAPLN3.145864	1091.87	902.012	2844.39	3.15339	1.6569	0.000637844	0.0769217
CD79B.974	247.875	205.3	640.881	3.12168	1.64232	0.000198658	0.0565856
GP1BA.2811	43.7287	36.2785	112.5	3.101	1.63273	0.00056348	0.0754645
RAD51L1.5890	337.861	281.546	857.693	3.04636	1.60709	0.000936228	0.087055
MFGE8.4240	8107.01	6764.2	20502.1	3.03098	1.59978	0.000594031	0.0754645
C8orf80.389643	41.5528	34.783	104.043	2.99119	1.58072	0.000893845	0.0862709
TNFRSF17.608	71.3415	59.7716	178.14	2.98035	1.57548	0.000489366	0.0712956
NCR3.259197	20.5127	17.1912	51.1726	2.97668	1.5737	0.000307277	0.0610854
ANGPT1.284	222.317	186.77	550.443	2.94718	1.55933	0.000204566	0.0565856
MPO.4353	9.58028	8.06635	23.555	2.92016	1.54605	0.00012352	0.0499362
LAX1.54900	152.941	129.104	372.975	2.88895	1.53054	0.000758851	0.0841803
FUT7.2529	34.4377	29.122	83.5055	2.86744	1.51976	0.000450336	0.070746
RND3.390	2575.36	2196.35	6073.89	2.76545	1.46752	0.000738168	0.0834727
P2RX1.5023	52.2933	44.7329	122.082	2.72913	1.44844	0.000711029	0.082453
TBX19.9095	185.779	159.789	425.685	2.66404	1.41362	4.16e-05	0.0416865
ANGPTL6.83854	14.3686	12.4024	32.5177	2.62189	1.39061	0.000596045	0.0754645
ZBTB32.27033	18.1247	15.6506	40.962	2.61727	1.38806	0.000327326	0.0610854
PRKX.5613	1773.75	1533.21	3994.06	2.60503	1.3813	8.63e-05	0.0491131
NCF1B.654816	75.3559	65.2222	168.898	2.58958	1.37272	0.000960288	0.0873819
ADA.100	452.809	395.883	978.288	2.47116	1.30519	1.33e-05	0.0222184
KRT36.8689	2.26103	1.98725	4.78817	2.40944	1.2687	0.00091421	0.0862709
SIGLEC10.89790	492.874	434.399	1032.64	2.37718	1.24925	0.000568439	0.0754645
PRSS53.339105	89.3841	78.8144	186.95	2.37203	1.24612	0.000456208	0.070746
UPK3BL.100134938	489.124	432.226	1014.34	2.34677	1.23068	0.000272562	0.0606268
HOMER3.9454	1426.01	1260.44	2954.36	2.3439	1.22891	0.000742202	0.0834727
CD97.976	1966.32	1738.66	4067.88	2.33967	1.2263	1.46e-05	0.0224881
CD72.971	217.425	192.496	447.538	2.32493	1.21719	0.000491473	0.0712956
HLA.DQB1.3119	6226.38	5540.04	12561.9	2.26748	1.18109	0.000447894	0.070746
CCL4L2.388372	245.949	218.997	494.73	2.25907	1.17573	0.000749979	0.0838761
MEF2B.100271849	63.5034	56.6324	126.929	2.24127	1.16432	0.000921149	0.0862709
CYBA.1535	2875.69	2569.62	5700.99	2.21862	1.14966	0.000138989	0.050171
LOC100130776.100130776	787.791	704.61	1555.62	2.20778	1.1426	0.000113637	0.0491131
GNB1L.54584	227.157	203.334	447.066	2.19868	1.13664	3.57e-05	0.0397447
MCOLN2.255231	185.785	166.465	364.124	2.18739	1.12921	0.000804824	0.0862709
FANCA.2175	841.738	754.918	1643.16	2.1766	1.12208	0.000804851	0.0862709
ESR2.2100	22.2562	19.9771	43.2948	2.16723	1.11585	7.45e-05	0.0466171
PERP.64065	17351.9	15587.2	33641.9	2.1583	1.1099	0.000782697	0.0851566
ISG20.3669	955.592	859.483	1842.74	2.14401	1.10031	0.000971288	0.0879828
CDC42EP1.11135	3696.54	3325.01	7126.05	2.14317	1.09974	0.000220811	0.0565856
IL18BP.10068	769.492	693.996	1466.38	2.11295	1.07926	0.000302879	0.0610854
CSF2RB.1439	853.557	772.325	1603.39	2.07606	1.05385	0.000542774	0.073917
GBGT1.26301	316.802	286.667	594.973	2.07549	1.05345	0.00033578	0.0610854
C14orf128.84837	134.913	122.136	252.852	2.07025	1.04981	7.24e-05	0.0466171
STAP2.55620	1876.83	1699.24	3516.15	2.06925	1.04911	0.000945198	0.087055
ZMYND15.84225	148.536	134.571	277.45	2.06174	1.04386	0.000944268	0.087055
KIAA1609.57707	1711.27	1551.15	3189.38	2.05614	1.03994	0.000322375	0.0610854
MAPRE2.10982	2216.32	2008.98	4130.25	2.05589	1.03977	0.000266994	0.0600556
PIM2.11040	1498.01	1361.34	2759.59	2.02711	1.01943	0.000138052	0.050171
PLCG2.5336	1066.46	971.245	1945.35	2.00294	1.00212	0.000107894	0.0491131
PCDH18.54510	1625.9	1481.48	2959.02	1.99734	0.998083	0.000311402	0.0610854
TAP2.6891	4011.84	3660.9	7251.28	1.98074	0.986036	0.000162986	0.052497
RARB.5915	390.237	356.453	702.086	1.96965	0.977936	0.000210631	0.0565856
GALNS.2588	1522.01	1391.75	2724.39	1.95752	0.969027	0.000148686	0.0513196
TMEM19.55266	2461.53	2255.68	4361.72	1.93366	0.951335	0.000146335	0.0513196
CPNE2.221184	1534.11	1406.34	2713.54	1.92951	0.948231	9.92e-06	0.0222184
FAM53A.152877	87.6022	80.325	154.776	1.92687	0.946261	0.000628658	0.0768899
TSPO.706	4017.23	3686	7074.72	1.91935	0.940617	1.24e-05	0.0222184
POLR2J3.548644	1990.99	1828.25	3493.19	1.91067	0.934077	0.000162035	0.052497
FAM3A.60343	1782.73	1640.46	3095.93	1.88723	0.91627	6.26e-05	0.0445905
KIFC3.3801	830.293	764.267	1439.77	1.88385	0.913685	0.000247465	0.0591157
PPP2R3B.28227	436.003	402.218	747.869	1.85936	0.894807	0.000734211	0.0834727
RELT.84957	478.212	441.407	817.95	1.85305	0.889903	0.000117529	0.0491131
C1orf38.9473	1026.3	947.697	1751.91	1.8486	0.88643	0.000515498	0.0724915
FADS3.3995	869.646	803.308	1481.99	1.84486	0.883514	0.000832245	0.0862709
ZSWIM4.65249	1147.57	1060.24	1953.72	1.84271	0.88183	1.22e-05	0.0222184
MPL.4352	36.1087	33.3787	61.3086	1.83676	0.877161	2.52e-05	0.0321723
FAM58A.92002	940.799	870.424	1590.41	1.82717	0.869612	0.000922223	0.0862709
HHLA3.11147	414.359	383.595	698.339	1.82051	0.864345	0.000899502	0.0862709
SH3BP1.23616	999.867	925.781	1683.74	1.81872	0.862925	0.000127216	0.0499362
MPST.4357	1748	1619.93	2930.2	1.80885	0.855071	0.000365601	0.0647697
RNF122.79845	527.833	489.389	882.7	1.80368	0.850941	0.000308389	0.0610854
CTU2.348180	538.778	499.809	898.491	1.79767	0.846127	0.00099562	0.0891922
C16orf61.56942	1012.84	940.101	1684.31	1.79162	0.841269	0.000225742	0.0565856
GIPC1.10755	5153.24	4786.36	8539.81	1.7842	0.835275	0.00026449	0.0600556
RIN3.79890	1169.56	1086.35	1937.72	1.7837	0.834876	0.000415637	0.0697239
KLHL36.79786	606.212	563.28	1002.51	1.77978	0.831695	0.000472852	0.070746
C19orf28.126321	2920.02	2718.02	4784.63	1.76033	0.815848	0.00011776	0.0491131
COX4NB.10328	1354.49	1261.33	2214.47	1.75567	0.812024	4.39e-05	0.0418731
NAA10.8260	2485.03	2314.46	4059.49	1.75396	0.810619	9.45e-05	0.0491131
NMI.9111	1375.45	1281.71	2240.79	1.74829	0.805945	0.000304079	0.0610854
DOHH.83475	506.113	471.777	823.058	1.74459	0.802891	0.000106487	0.0491131
YDJC.150223	920.277	858.201	1493.29	1.74003	0.79911	0.000155814	0.052497
TRIP10.9322	1962.59	1830.34	3183.33	1.7392	0.798427	0.000390116	0.0667498
ZNF276.92822	926.222	864.69	1494.21	1.72803	0.789128	4.16e-05	0.0416865
ARRDC2.27106	1601.93	1499.67	2545.93	1.69766	0.763548	0.000481136	0.0712956
CTNNBIP1.56998	2608.16	2442.84	4134.17	1.69236	0.759037	0.000895899	0.0862709
NUDT7.283927	181.737	170.459	285.84	1.67689	0.745786	0.000537368	0.0736819
PLSCR3.57048	1624.6	1526.47	2530.42	1.65769	0.729174	0.000769082	0.0841803
PAG1.55824	906.184	852.151	1404.95	1.64871	0.721339	0.000920055	0.0862709
RNF166.115992	537.033	505.268	830.248	1.64318	0.716495	6.68e-05	0.0445905
LRRC8D.55144	2742.46	2588.87	4160.2	1.60696	0.684332	0.000331946	0.0610854
TRAF3IP2.10758	2214.4	2092.61	3338.64	1.59544	0.673957	0.000202599	0.0565856
CD58.965	596.233	563.545	897.965	1.59342	0.672129	0.000849689	0.0862709
CHST12.55501	729.287	689.484	1096.7	1.59061	0.669576	0.000714159	0.082453
PML.5371	4415.59	4180.1	6589.31	1.57635	0.65659	0.000228954	0.0565856
APBA3.9546	570.873	541.608	841.006	1.55279	0.634866	0.000449661	0.070746
GMIP.51291	1279.64	1214.17	1883.96	1.55164	0.633796	0.000460978	0.070746
PAPSS1.9061	6331.51	6011.48	9285.67	1.54466	0.627286	0.00071666	0.082453
BANP.54971	710.879	675.936	1033.43	1.52889	0.612488	0.000276091	0.0607087
APP.351	69250.4	65874.6	100411	1.52427	0.608123	0.000951642	0.087055
MFSD10.10227	3699.93	3521.73	5344.77	1.51765	0.601843	0.000441167	0.070746
SH3GL1.6455	5215.95	4969.01	7495.39	1.50843	0.593045	6.51e-05	0.0445905
C19orf29.58509	1027.79	979.707	1471.61	1.5021	0.586977	0.000108733	0.0491131
DENND3.22898	980.851	935.121	1402.97	1.50031	0.585262	0.000313612	0.0610854
MAP1LC3B2.643246	729.407	695.407	1043.25	1.50021	0.585162	0.000564038	0.0754645
ZC3H18.124245	2135	2036.19	3047.13	1.49649	0.581579	0.000711846	0.082453
ASF1A.25842	1638.98	1563.7	2333.93	1.49257	0.577801	0.000889217	0.0862709
ELOVL1.64834	5638.68	5407.99	7768.06	1.4364	0.522461	0.000848204	0.0862709
MTHFSD.64779	762.146	731.059	1049.1	1.43504	0.521095	0.000894331	0.0862709
LOC285359.285359	191.74	184.291	260.498	1.41351	0.499285	0.000114133	0.0491131
VMAC.400673	344.049	330.828	466.096	1.40888	0.494546	0.000581442	0.0754645
CC2D1B.200014	2002.87	1928.85	2686.15	1.39262	0.4778	0.000102095	0.0491131
MED15.51586	4151.99	4005.43	5504.89	1.37436	0.458755	0.000534858	0.0736819
AP4B1.10717	915.451	885.624	1190.78	1.34456	0.427135	0.000135867	0.050171
QRICH1.54870	4538.21	4631.47	3677.39	0.794002	-0.332785	0.000456148	0.070746
USP19.10869	3908.11	4002.54	3036.43	0.758626	-0.398538	0.000769519	0.0841803
GIGYF2.26058	6434.19	6595.05	4949.31	0.750458	-0.414156	0.000878028	0.0862709
TRIM32.22954	1658.31	1700.66	1267.34	0.745206	-0.424289	0.000243366	0.0591157
SP1.6667	10435.2	10713.6	7865.85	0.734194	-0.445767	0.000206864	0.0565856
KIAA1143.57456	2357.95	2425.15	1737.71	0.716537	-0.480888	0.000634913	0.0769217
COPZ1.22818	13658.7	14056.4	9987.24	0.710512	-0.493068	0.000487038	0.0712956
PHAX.51808	1801.12	1854.64	1307.1	0.704775	-0.504764	0.000582326	0.0754645
PRKAB1.5564	2085.96	2148.49	1508.78	0.702249	-0.509946	0.000832089	0.0862709
SFRS2IP.9169	8826.77	9093.35	6366.06	0.700079	-0.514411	0.000866312	0.0862709
ZNF445.353274	1885.56	1942.81	1357.1	0.698525	-0.517617	0.000327813	0.0610854
FBXO38.81545	2795.11	2881.32	1999.31	0.693886	-0.52723	0.000878734	0.0862709
CDK5RAP2.55755	4583.24	4729.1	3236.82	0.684446	-0.546991	0.000724845	0.0829181
IPO11.51194	2278.9	2352.49	1599.57	0.679948	-0.556504	0.000502364	0.0718345
GIN1.54826	463.059	478.556	320.006	0.668691	-0.580589	0.000387596	0.0667498
EIF4B.1975	26165.8	27044.6	18053.4	0.667542	-0.583069	0.000434828	0.070746
METT5D1.196074	1193.49	1234.58	814.199	0.659496	-0.600565	0.000199264	0.0565856
C9orf129.445577	319.973	331.186	216.464	0.653602	-0.613515	0.000179445	0.0559615
FXC1.26515	2501.42	2590.52	1678.97	0.648122	-0.625663	0.000320155	0.0610854
FAM120AOS.158293	4492.6	4652.92	3012.73	0.647491	-0.627068	0.000516348	0.0724915
BRPF3.27154	4556.32	4721.11	3035.12	0.642881	-0.637375	5.41e-05	0.0445905
KBTBD4.55709	1532.83	1589.83	1006.63	0.633167	-0.659341	0.000342856	0.0612825
MPDZ.8777	2274.49	2359.31	1491.5	0.632176	-0.661601	0.000470459	0.070746
TMBIM6.7009	80449	83512.9	52166.9	0.624657	-0.678864	0.000817024	0.0862709
TMEM161B.153396	826.786	858.871	530.609	0.617798	-0.694792	0.000223643	0.0565856
LRRC37A.9884	1092.18	1135.07	696.245	0.613393	-0.705117	0.00062365	0.0768899
CTDSPL.10217	3818.61	3970.73	2414.46	0.608065	-0.717702	0.000877549	0.0862709
NEK4.6787	1840.26	1916.29	1138.42	0.594077	-0.751278	1.16e-05	0.0222184
SPOPL.339745	5648.73	5885.03	3467.55	0.589216	-0.763131	0.000228392	0.0565856
LZTFL1.54585	2208.72	2303.19	1336.69	0.580367	-0.784963	0.000200619	0.0565856
ANKRD42.338699	1086.38	1133.07	655.385	0.578416	-0.78982	0.000906665	0.0862709
DIXDC1.85458	2241.36	2338.09	1348.45	0.576732	-0.794028	0.000816736	0.0862709
ZNF619.285267	319.025	333.031	189.744	0.56975	-0.8116	0.000824777	0.0862709
FYCO1.79443	4467.02	4668.27	2609.36	0.558956	-0.839193	2.82e-06	0.0126746
TRIM66.9866	800.513	837.035	463.387	0.553605	-0.853071	0.000916335	0.0862709
DNAL1.83544	1500.52	1569.75	861.465	0.54879	-0.865673	0.000165113	0.052497
LOC90784.90784	939.374	982.831	538.232	0.547635	-0.868714	2.57e-05	0.0321723
KIF9.64147	471.049	492.921	269.154	0.546039	-0.872924	0.00059495	0.0754645
INADL.10207	6744.2	7074.52	3695.08	0.522308	-0.937026	0.0002087	0.0565856
PHOSPHO2.493911	322.989	338.877	176.324	0.520318	-0.942534	0.000223843	0.0565856
CCDC125.202243	2010.49	2110.25	1089.66	0.516365	-0.953537	0.000600101	0.0754645
ZNF620.253639	175.721	184.516	94.5406	0.512372	-0.964737	0.000426922	0.0706326
MEIS3P1.4213	1410.01	1481.61	749.096	0.505595	-0.983947	0.000517822	0.0724915
LRIG1.26018	12540.6	13229	6186.35	0.467636	-1.09654	0.000338702	0.0610854
TCTN2.79867	1496.86	1580.52	724.668	0.458501	-1.125	1.54e-07	0.00307825
FOXA1.3169	20916.1	22102.6	9962.98	0.45076	-1.14957	3.48e-05	0.0397447
MLPH.79083	17116.4	18124.3	7813.22	0.431091	-1.21394	5.54e-05	0.0445905
LRRC37A2.474170	407.593	431.658	185.459	0.429643	-1.21879	1.14e-05	0.0222184
TCEA3.6920	3717.16	3936.8	1689.75	0.429219	-1.22021	0.000333566	0.0610854
ACER2.340485	442.015	470.698	177.248	0.376564	-1.40903	0.000133884	0.050171
GPR77.27202	344.626	367.042	137.714	0.3752	-1.41427	0.000900885	0.0862709
ZNF214.7761	153.601	163.795	59.4978	0.363244	-1.46099	0.000165209	0.052497
KIF13B.23303	5830.32	6234.18	2102.33	0.337226	-1.56821	0.000596145	0.0754645
SLC44A4.80736	7974.24	8546.67	2690.31	0.314779	-1.66759	0.000417946	0.0697239
GATM.2628	1898.66	2037.22	619.618	0.304148	-1.71715	0.000626564	0.0768899
DNAH5.1767	1240.71	1331.51	402.566	0.302338	-1.72576	0.000862135	0.0862709
KCNJ11.3767	1060.9	1138.89	340.945	0.299365	-1.74002	6.08e-05	0.0445905
NOSTRIN.115677	1447.51	1554.59	459.083	0.295307	-1.75971	0.000842876	0.0862709
LRRC48.83450	252.737	272.083	74.1589	0.27256	-1.87535	0.000251003	0.0591157
KIF5C.3800	1855.17	2005.21	470.134	0.234456	-2.09261	0.000998322	0.0891922
X..652919	69.026	74.651	17.1037	0.229115	-2.12586	0.000181702	0.0559615
ABCC6.368	288.38	312.341	67.1951	0.215134	-2.2167	0.000886381	0.0862709
ESR1.2099	37198.6	40311.2	8467.23	0.210047	-2.25122	8.8e-05	0.0491131
FLJ45983.399717	902.35	979.969	185.866	0.189665	-2.39848	0.000220961	0.0565856
THPO.7066	177.803	195.007	18.9961	0.0974126	-3.35975	0.000266176	0.0600556
ABCC8.6833	608.521	669.644	44.3044	0.0661612	-3.91787	9.69e-05	0.0491131
LOC728606.728606	322.48	355.721	15.6475	0.0439883	-4.50674	9.47e-05	0.0491131

## Sheet: D
Table S3D - Differentially expressed genes and other transcripts identified in luminal A tumors with DESeq.
Gene Symbol.Entrez ID	Base Mean	Base Mean CA	Base Mean AA	Fold-Change	log2 Fold-Change	P-value	Padj
LECT1.11061	1.32455	0.910119	7.61867	8.37107	3.06541	0.000667563	0.406106
IGLL1.3543	0.799721	0.562212	4.40688	7.83847	2.97057	0.000443859	0.330504
PRSS45.377047	7.18565	5.91327	26.5099	4.48312	2.1645	0.000190197	0.330504
ST8SIA5.29906	11.8201	10.1606	37.0225	3.64372	1.86541	0.000475379	0.330504
SOX30.11063	8.91974	7.79287	26.0341	3.34076	1.74018	3.23e-05	0.170906
RBP1.5947	1904.74	1684.25	5253.5	3.1192	1.64118	0.000363133	0.330504
SERPINC1.462	9.98252	8.89614	26.482	2.9768	1.57376	0.000141041	0.330504
DIAPH3.81624	493.204	443.533	1247.58	2.81283	1.49202	0.000502718	0.330504
KRTAP5.1.387264	15.7114	14.3296	36.6981	2.561	1.35671	0.000417387	0.330504
LRRC4.64101	182.633	167.446	413.294	2.46823	1.30348	8.45e-06	0.0848789
CHRNA10.57053	27.0389	24.9325	59.0295	2.36757	1.24341	0.000239605	0.330504
C4orf44.345222	7.6197	7.06508	16.0429	2.27073	1.18315	0.000374939	0.330504
FLJ26850.400710	5.24745	4.8977	10.5592	2.15595	1.10833	0.00099563	0.420256
C10orf35.219738	606.156	570.075	1154.14	2.02454	1.0176	0.000422056	0.330504
PCBD1.5092	3742.84	3527.44	7014.29	1.9885	0.991678	0.000912475	0.420256
CLDN20.49861	5.75604	5.44918	10.4165	1.91157	0.934757	0.00084009	0.420256
SULT1A1.6817	1429.46	1356.63	2535.58	1.86903	0.902289	0.000743099	0.413267
SLC22A15.55356	410.96	391.952	699.639	1.78501	0.835933	0.000519284	0.330504
ZFPM1.161882	270.643	258.77	450.967	1.74274	0.801353	0.000261058	0.330504
PWWP2B.170394	1189.15	1137.16	1978.78	1.74011	0.799177	0.000464475	0.330504
CCNJ.54619	587.963	562.39	976.361	1.73609	0.795843	0.000519921	0.330504
ADO.84890	2084.34	1999.72	3369.43	1.68495	0.752707	7.89e-06	0.0848789
PIGB.9488	845.418	811.687	1357.71	1.6727	0.742181	0.000687699	0.406106
TYSND1.219743	1697.05	1630.17	2712.83	1.66414	0.734775	0.000447203	0.330504
GRTP1.79774	976.319	938.102	1556.74	1.65946	0.730716	0.000345593	0.330504
IER5L.389792	881.174	846.859	1402.34	1.65593	0.727642	0.000924221	0.420256
CDAN1.146059	1157.8	1113.39	1832.33	1.64572	0.718718	0.000802741	0.413267
LOC285359.285359	186.161	179.264	290.918	1.62285	0.69853	4.1e-05	0.170906
SAR1A.56681	8858.03	8538.65	13708.5	1.60547	0.682993	0.000792171	0.413267
RSL24D1.51187	5751.69	5544.37	8900.44	1.60531	0.682854	0.000526752	0.330504
ZNF511.118472	919.875	890.281	1369.34	1.5381	0.621145	0.000910903	0.420256
C14orf126.112487	1015.93	983.854	1503.12	1.52779	0.611442	0.000417257	0.330504
DKFZP686I15217.401232	165.167	160.251	239.84	1.49665	0.58174	0.000797291	0.413267
IER3IP1.51124	4114.53	3995.66	5919.89	1.48158	0.567136	0.000464486	0.330504
C22orf27.150291	345.345	335.531	494.384	1.47344	0.559184	0.000713779	0.409465
DHRSX.207063	1266.01	1237.04	1706	1.3791	0.463727	0.000212406	0.330504
MGST2.4258	2027.26	1981.02	2729.55	1.37785	0.462418	0.000514954	0.330504
PPP2R2D.55844	1799.56	1761.07	2384.18	1.35383	0.437042	0.000140071	0.330504
USP27X.389856	386.434	378.247	510.772	1.35037	0.433351	0.000171861	0.330504
LYRM7.90624	1070.53	1088.6	796.115	0.73132	-0.451425	0.000362168	0.330504
FYCO1.79443	4715.3	4810.36	3271.46	0.680085	-0.556213	0.000240655	0.330504
LOC90784.90784	924.756	944.359	627.042	0.663986	-0.590774	0.000197869	0.330504
RPL23AP7.118433	217.279	222.512	137.799	0.619291	-0.691312	4.26e-05	0.170906
DDX11L2.84771	53.7546	55.3595	29.3804	0.53072	-0.913978	0.000355353	0.330504
FAM188B.84182	447.637	463.407	208.134	0.449138	-1.15477	0.00086972	0.420256
PKDREJ.10343	21.818	22.5963	9.99764	0.442446	-1.17643	0.000956244	0.420256

## Sheet: E
Table S3E - Differentially expressed genes and other transcripts identified in HER2 tumors with DESeq.
Gene Symbol.Entrez ID	Base Mean	Base Mean CA	Base Mean AA	Fold-Change	log2 Fold-Change	P-value	Padj
TMIGD1.388364	64.7775	0.05061	431.563	8527.23	13.0579	0.000463602	0.530275
LST.3TM12.338821	314.916	0.51308	2096.53	4086.16	11.9965	0.000422108	0.530275
RAD21L1.642636	10.1186	0.836394	62.7175	74.9856	6.22854	0.000299873	0.530275
FCN2.2220	144.964	23.2087	834.91	35.9741	5.16889	0.000172942	0.437034
HSD3B2.3284	31.4676	5.53005	178.447	32.2686	5.01206	0.000777834	0.713268
LOC100188947.100188947	78.1543	14.2061	440.528	31.0098	4.95465	0.000538993	0.530725
HPGD.3248	1897.78	352.064	10656.8	30.2696	4.9198	0.000543052	0.530725
SCGB3A2.117156	3.5365	0.766795	19.2315	25.0804	4.64849	0.000922987	0.713268
C12orf74.338809	20.3187	4.43698	110.315	24.8627	4.63591	0.000891312	0.713268
LAIR2.3904	26.1969	8.10935	128.693	15.8697	3.9882	2.61e-06	0.0255109
CYP4F8.11283	112.336	35.6749	546.751	15.3259	3.9379	2.24e-06	0.0255109
MPV17L.255027	1604.79	530.266	7693.73	14.5092	3.8589	0.000123438	0.437034
THRSP.7069	1053.64	349.597	5043.19	14.4257	3.85057	6.02e-05	0.350994
ZNF486.90649	354.273	161.302	1447.77	8.97553	3.166	0.000930243	0.713268
TARP.445347	133.172	61.6399	538.521	8.73655	3.12706	0.000230676	0.500976
C4A.720	46520.8	22164.2	184541	8.32609	3.05764	0.000178874	0.437034
DNALI1.7802	299.154	148.202	1154.55	7.7904	2.9617	0.000928208	0.713268
PCK2.5106	6280.19	3171.08	23898.5	7.53638	2.91387	0.000459275	0.530275
LRFN2.57497	46.6754	25.0204	169.387	6.76995	2.75914	0.000488333	0.530275
AMBP.259	71.6096	38.8265	257.381	6.629	2.72879	0.000371759	0.530275
CYP4F11.57834	203.222	118.602	682.74	5.75658	2.52521	0.000435549	0.530275
VWDE.221806	138.196	161.45	6.42591	0.0398013	-4.65104	0.000948786	0.713268
RPS28.6234	1253.89	1469.62	31.4193	0.0213792	-5.54765	0.000147487	0.437034
CA9.768	578.755	679.962	5.25288	0.00772525	-7.0162	7.18e-05	0.350994
ZIC1.7545	371.653	437.123	0.65661	0.00150212	-9.37879	0.000439019	0.530275

## Sheet: F
Table S3F - Differentially expressed genes and other transcripts identified in triple negative tumors with DESeq.
Gene Symbol.Entrez ID	Base Mean	Base Mean CA	Base Mean AA	Fold-Change	log2 Fold-Change	P-value	Padj
ACTL8.81569	949.274	342.302	4409.02	12.8805	3.68712	0.000425759	0.944097
PGLYRP1.8993	0.930241	0.456241	3.63205	7.96081	2.99292	0.0007644	1
TREML4.285852	2.16895	1.19791	7.7039	6.43112	2.68507	2.1e-05	0.180753
CCL3L3.414062	5.79575	4.21243	14.8207	3.51833	1.81489	0.000273828	0.910798
LHX6.26468	394.357	300.204	931.03	3.10133	1.63289	0.000789158	1
CCL3L1.6349	76.9318	58.8985	179.722	3.05138	1.60946	0.000227129	0.906562
CCL4L2.388372	290.587	230.063	635.57	2.76259	1.46602	0.000610787	1
DDX51.317781	1203.3	1077.18	1922.23	1.78451	0.83553	7.78e-05	0.388404
C15orf41.84529	501.228	448.842	799.829	1.78198	0.833484	0.000663041	1
CROCCL1.84809	655.382	590.875	1023.07	1.73145	0.791978	0.000336091	0.944097
ZNF230.7773	265.172	284.062	157.504	0.554472	-0.850814	0.000384539	0.944097
TTC30A.92104	669.65	723.605	362.105	0.500418	-0.998793	0.000572439	1
LOC90784.90784	993.786	1111	325.658	0.293121	-1.77043	1.86e-09	3.71e-05
ZSCAN1.284312	16.5965	19.327	1.0325	0.0534227	-4.2264	0.000925777	1
STON1.GTF2A1L.286749	19.2345	22.5475	0.350392	0.0155402	-6.00786	2.72e-05	0.180753
